# Supplementary material for: Nonlinear optical interactions of Co: ZnO nanoparticles in continuous and pulsed mode of operations
Source: Royal Society of Chemistry journal article supplement (doi:10.1039/c5ra10756c), 2015-01-01
Supplement: c5ra10756c1.pdf [file c5ra10756c1.pdf]

## Supplementary information

### **Nonlinear Optical Interactions of Co: ZnO Nanoparticles in Continuous and Pulsed Mode of Operations**

Rajeswari Ponnusamy<sup>1</sup>, Dhanuskodi Sivasubramanian<sup>1, \*</sup>, P. Sreekanth<sup>2</sup>,  
Vinitha Gandhiraj<sup>3</sup>, Reji Philip<sup>2</sup>, G. M. Bhalerao<sup>4</sup>

<sup>1</sup>Nonlinear Optical Materials Laboratory, School of Physics, Bharathidasan University, Tiruchirappalli – 620 024, India.

<sup>2</sup>Light and Matter Physics Group, Raman Research Institute, C.V. Raman Avenue, Sadashivanagar, Bangalore-560080, India.

<sup>3</sup>School of Advanced Sciences, Vellore Institute of Technology, Chennai- 600 127, India.

<sup>4</sup>UGC-DAE Consortium for Scientific Research, Kalpakkam node, Kokilamedu-603104, India.

\*Corresponding author E-mail: dhanus2k3@yahoo.com

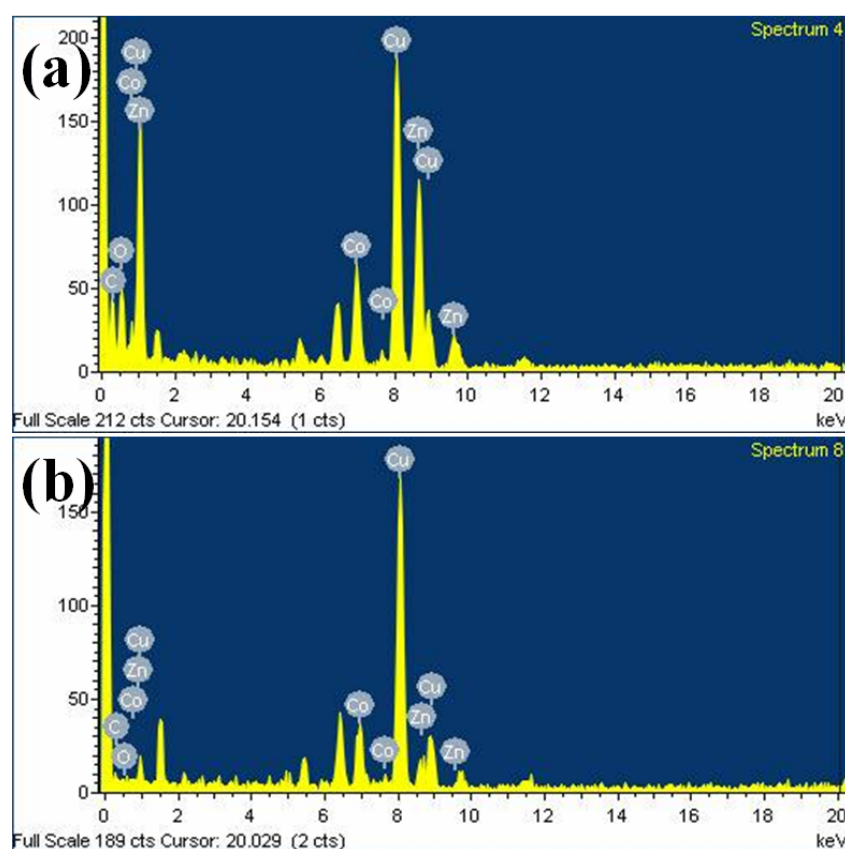

Figure S1. EDS spectrum of (a) 5 and b) 10 at. % Co: ZnO NPs.

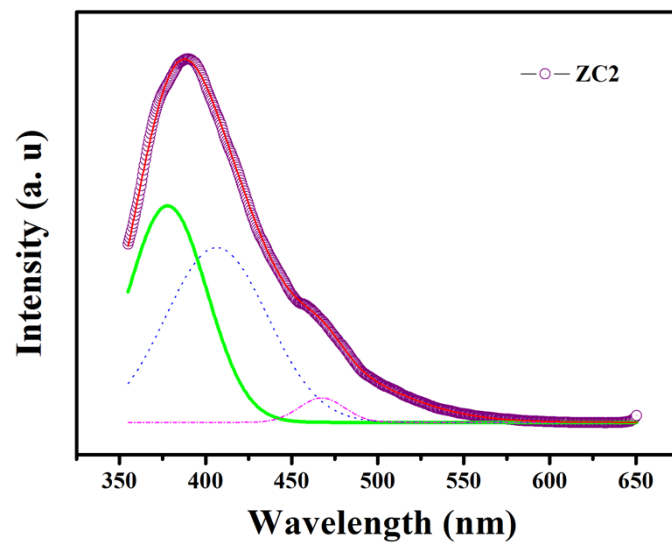

Figure S2. Gaussian deconvoluted emission spectrum of 5 at. % Co: ZnO NPs. Hollow circles-experimental data, red solid line-Gaussian fitting, Green, blue and pink lines-band edge, neutral and ionized Zn vacancy emissions.
